# Supplementary material for: Genetic risk factors underlying white matter hyperintensities and cortical atrophy
Source: PubMed Central journal article supplement — Nat Commun. 2024 Nov 4;15:9517. doi: 10.1038/s41467-024-53689-1 (PMC11535513; doi:10.1038/s41467-024-53689-1), 2024-11-04
Supplement: 41467_2024_53689_MOESM3_ESM.pdf [file 41467_2024_53689_MOESM3_ESM.pdf]

## **Description of Additional Supplementary Files**

**Supplementary Data 1.** A technical summary of the acquisition methods for WMH and metabolomic data in each study population.

**Supplementary Data 2.** Meta-GWAS of PC1 (WMH and insular CT) and regulated genes in the cerebral cortex

**Supplementary Data 3.** Two-sample Mendelian Randomization (MR) testing causal effects of WMH on insular or mean cortical thickness

**Supplementary Data 4.** GWAS-significant loci of PC1 (WMH and insular CT) and their associations with WMH or insular CT

**Supplementary Data 5.** Genome-wide significant loci of PC1 with insular CT and their association with loci of PC1 with mean CT in the present set of cohorts
